# Supplementary material
Source: Springer Nature journal article supplement (https://www.springermedizin.de/resource/supplementary/12916_2013_864_MOESM2_ESM.pdf/9598520)
Supplement: MOESM2 [file 9598520]

# sFlt-1 Validation

$p$  value =  $2.23 \times 10^{-10}$  (all Normal vs PE)

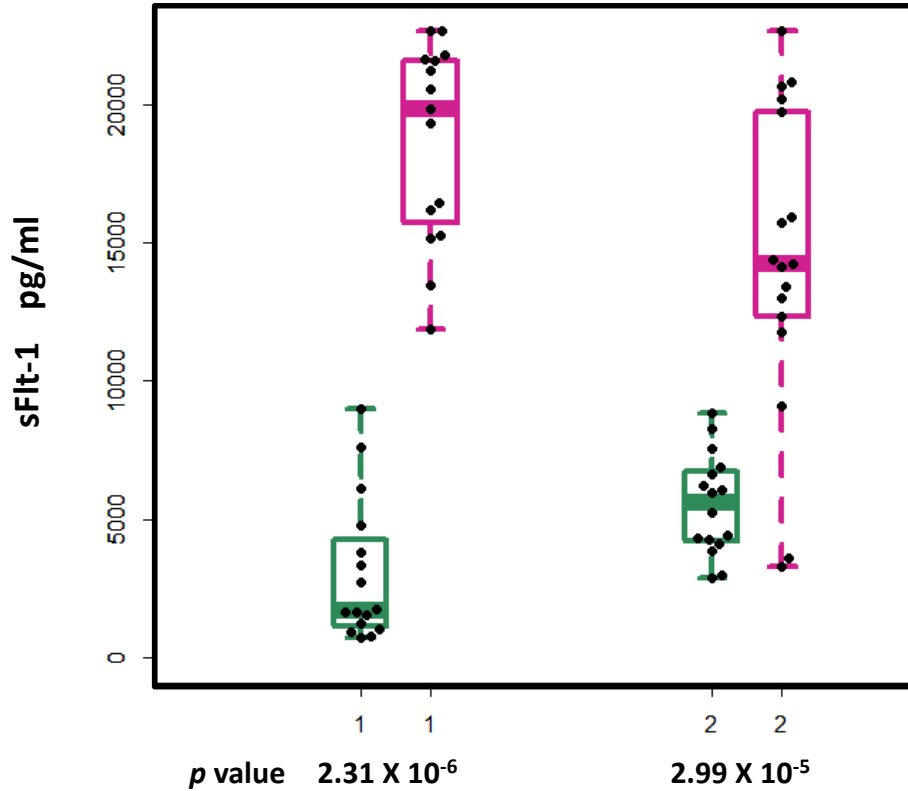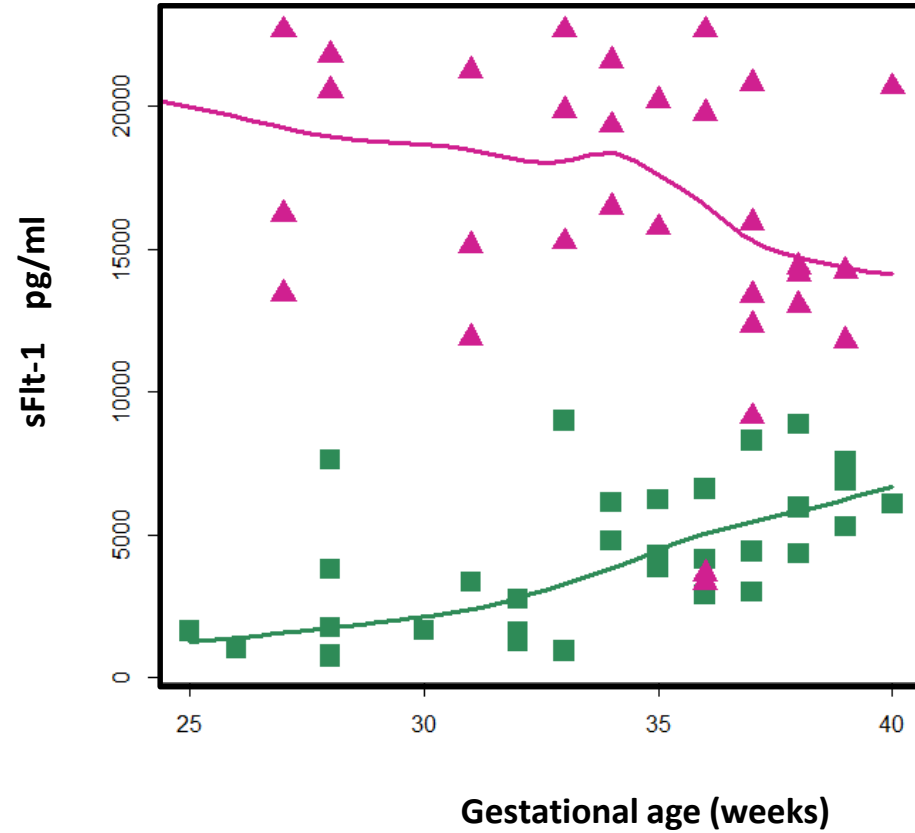

GA 23-34 weeks

Normal

N=16

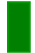

PE

N=15

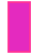

GA > 34 weeks

Normal

N=16

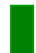

PE

N=17

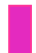

# PIGF Validation

$p$  value =  $6.48 \times 10^{-5}$  (all Normal vs PE)

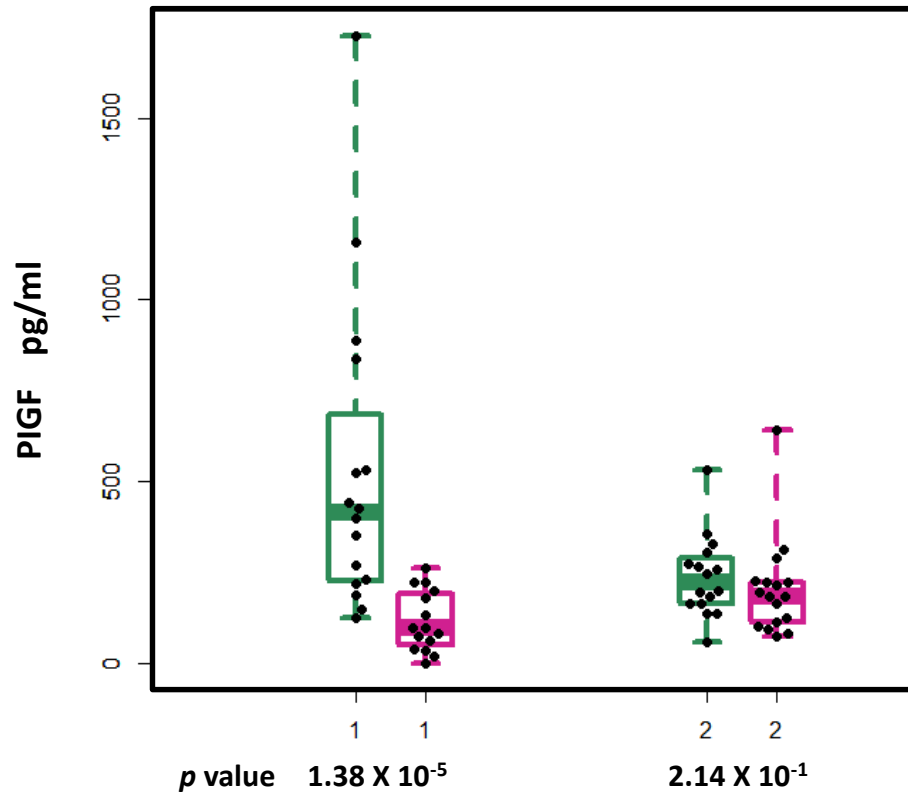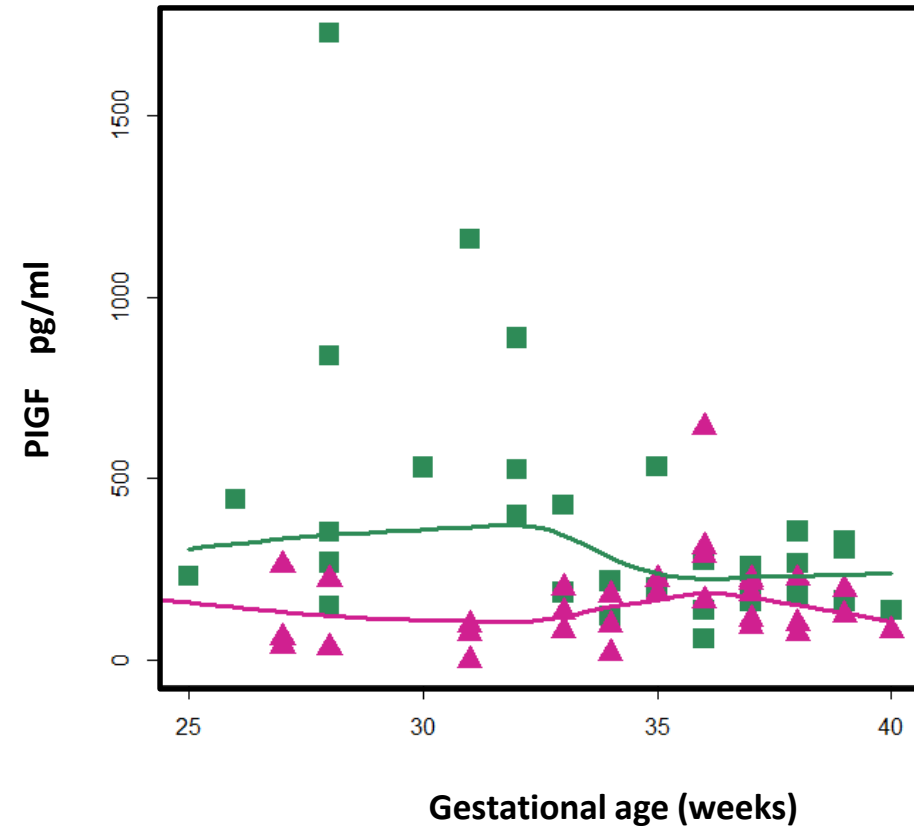

GA 23-34 weeks

Normal

N=16

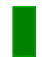

PE

N=15

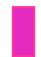

GA > 34 weeks

Normal

N=16

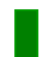

PE

N=17

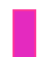

# HPX Validation

$p$  value =  $8.581 \times 10^{-5}$  (all Normal vs PE)

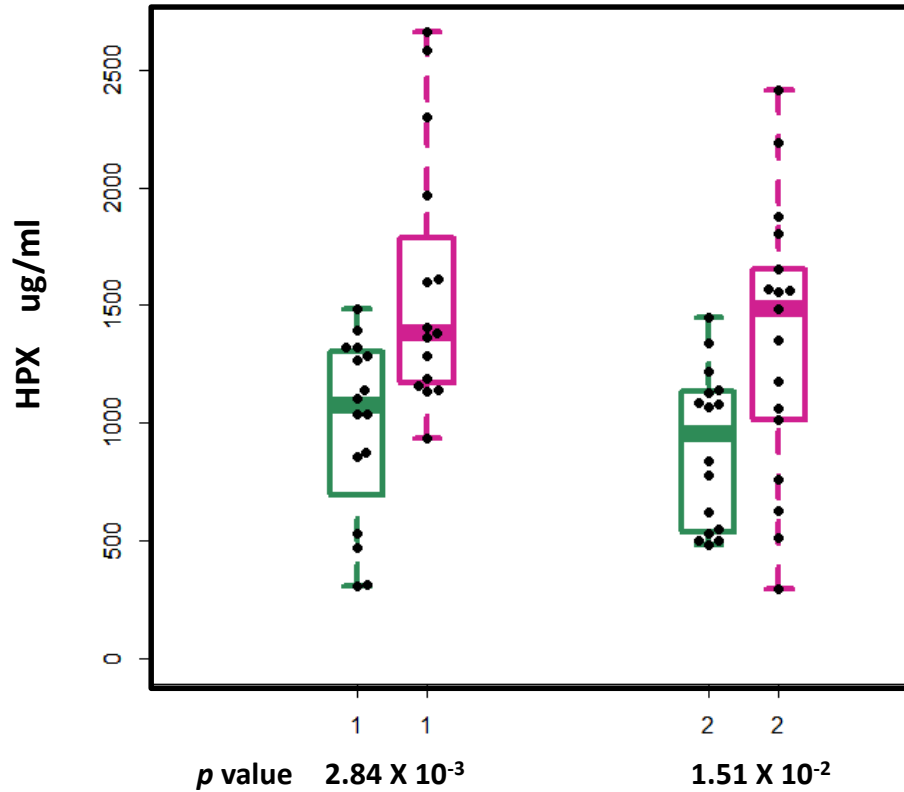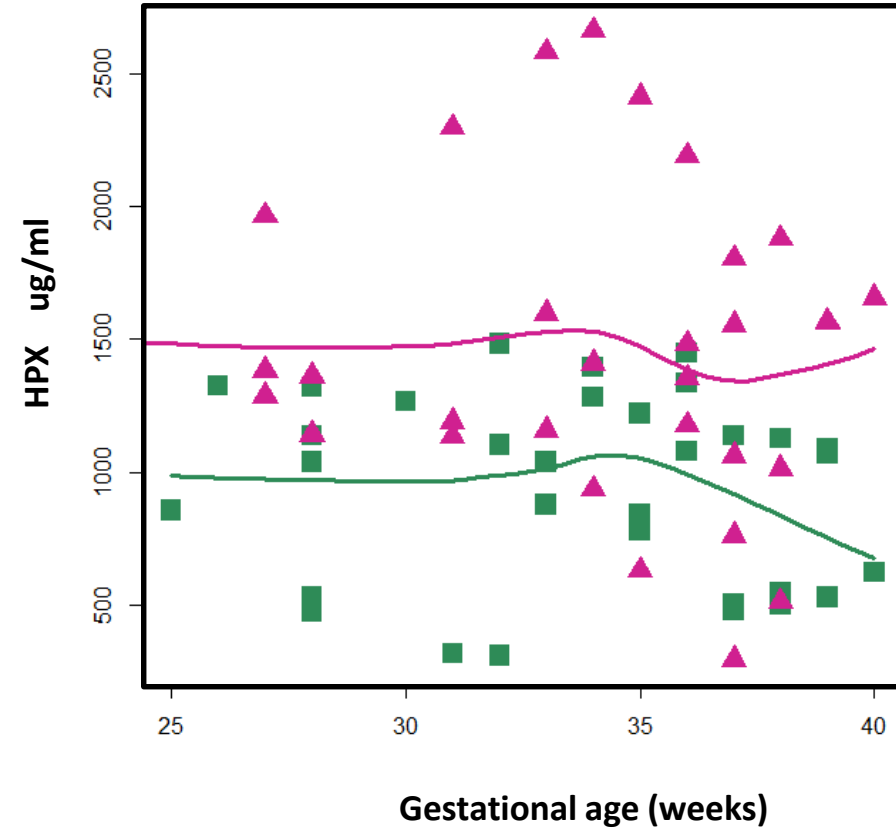

GA 23-34 weeks  
 Normal N=16  
 PE N=15

GA > 34 weeks  
 Normal N=16  
 PE N=17

# ADAM12 Validation

$p$  value =  $1.50 \times 10^{-3}$  (all Normal vs PE)

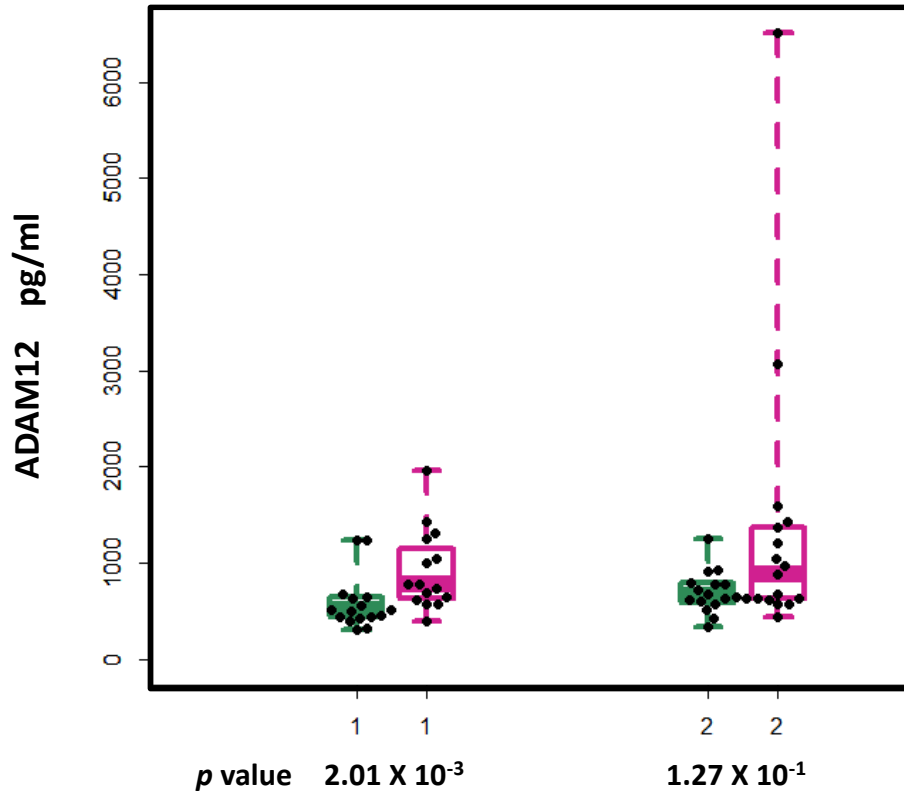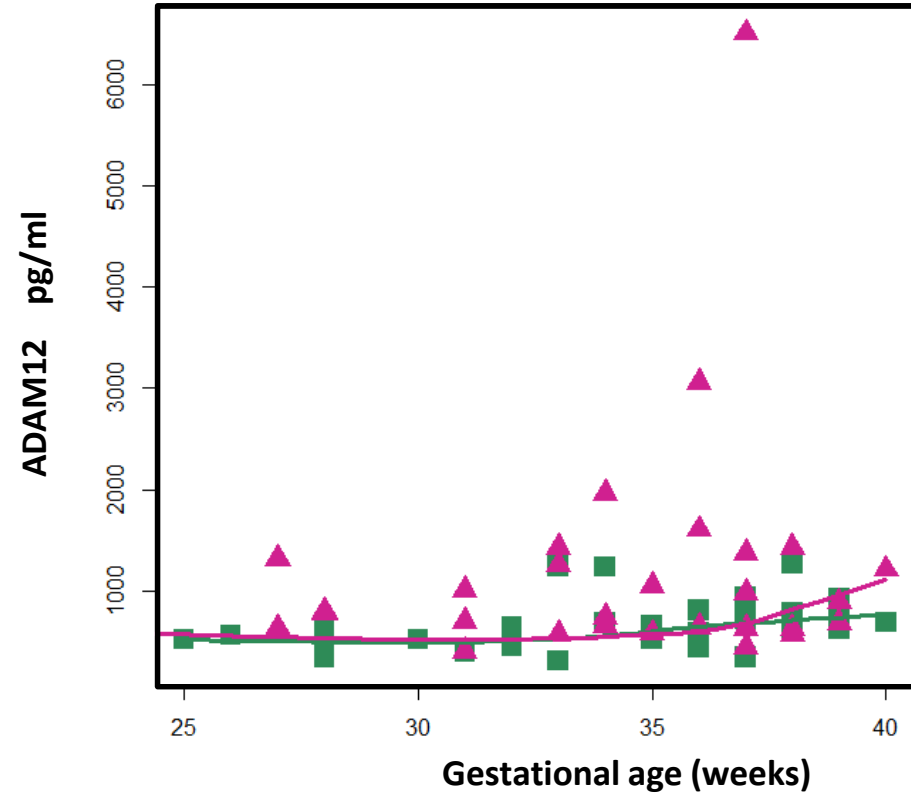

GA 23-34 weeks  
 Normal N=16  
 PE N=15

GA > 34 weeks  
 Normal N=16  
 PE N=17

# HP Validation

$p$  value =  $3.87 \times 10^{-2}$  (all Normal vs PE)

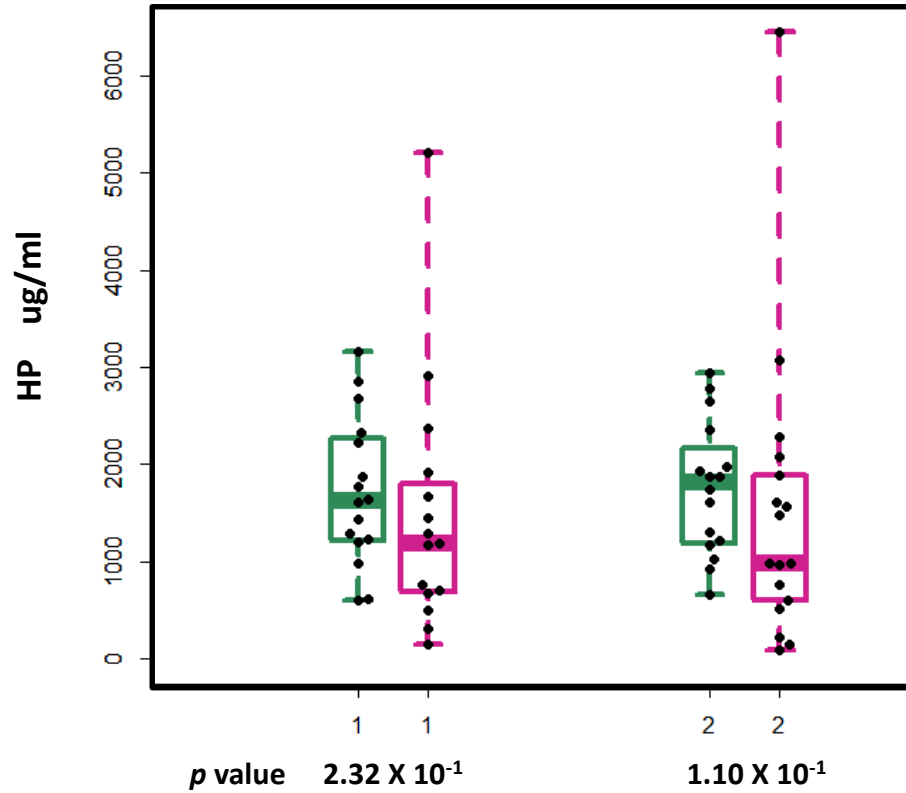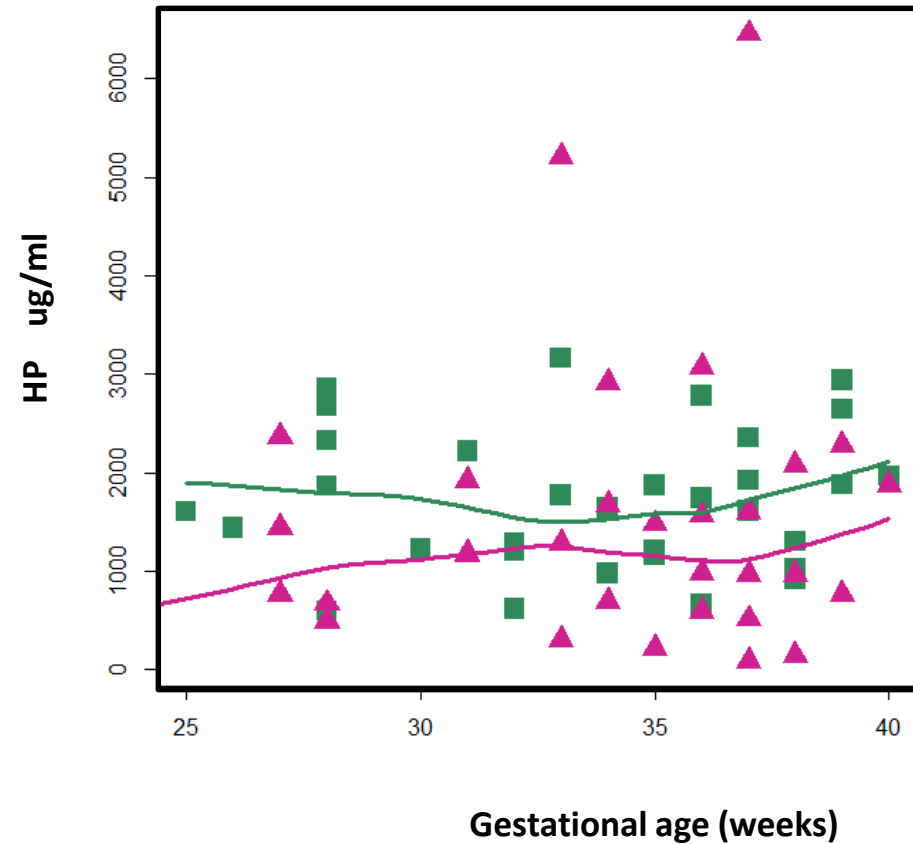

GA 23-34 weeks  
 Normal N=16  
 PE N=15

GA > 34 weeks  
 Normal N=16  
 PE N=17

# A2M Validation

$p$  value =  $2.42 \times 10^{-3}$  (all Normal vs PE)

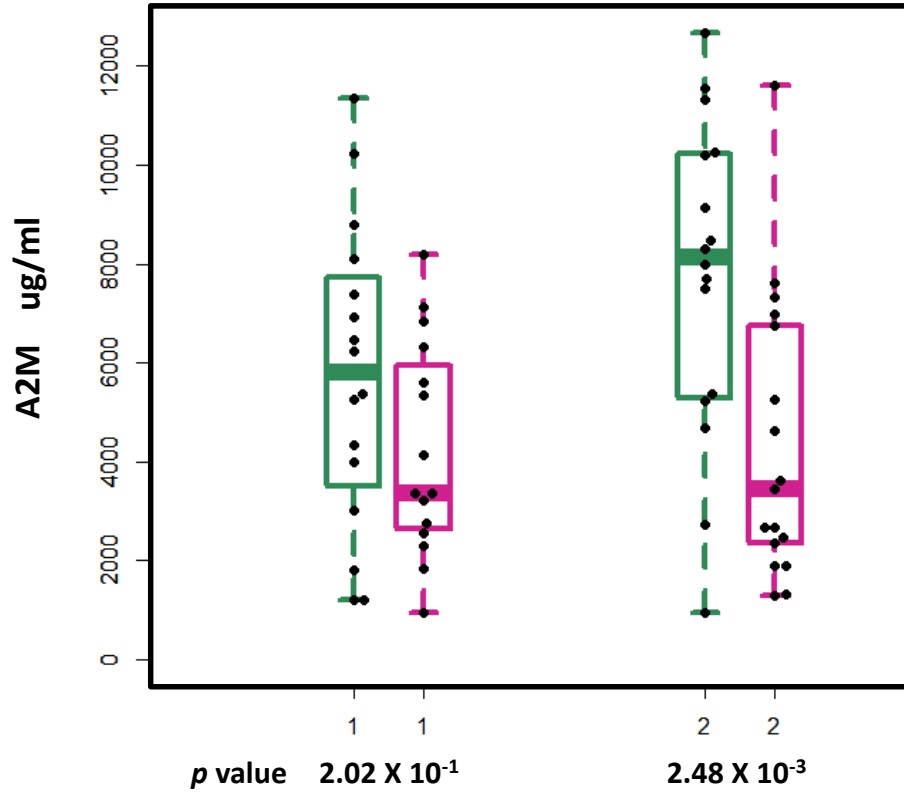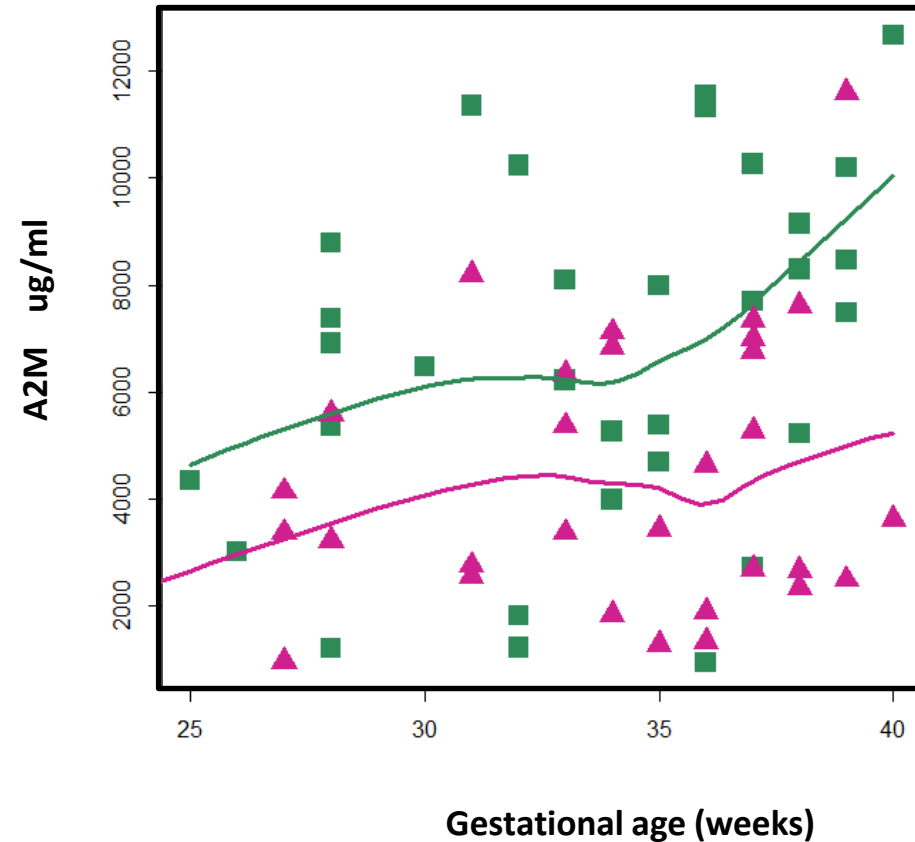

GA 23-34 weeks  
 Normal N=16  
 PE N=15

GA > 34 weeks  
 Normal N=16  
 PE N=17

# APO-E Validation

$p$  value =  $2.25 \times 10^{-3}$  (all Normal vs PE)

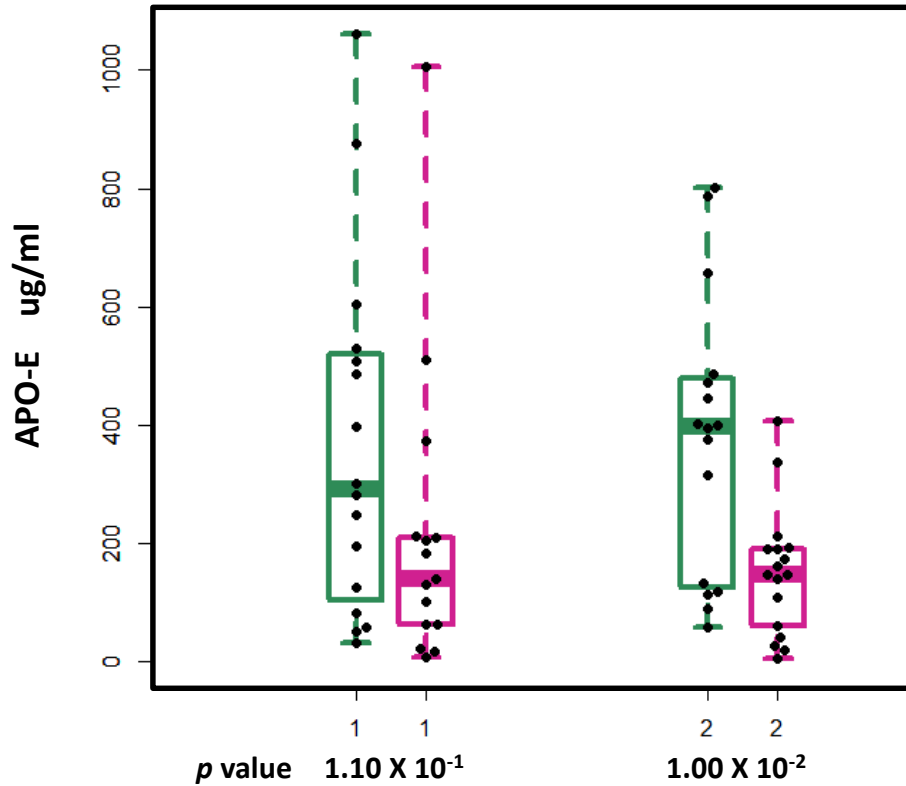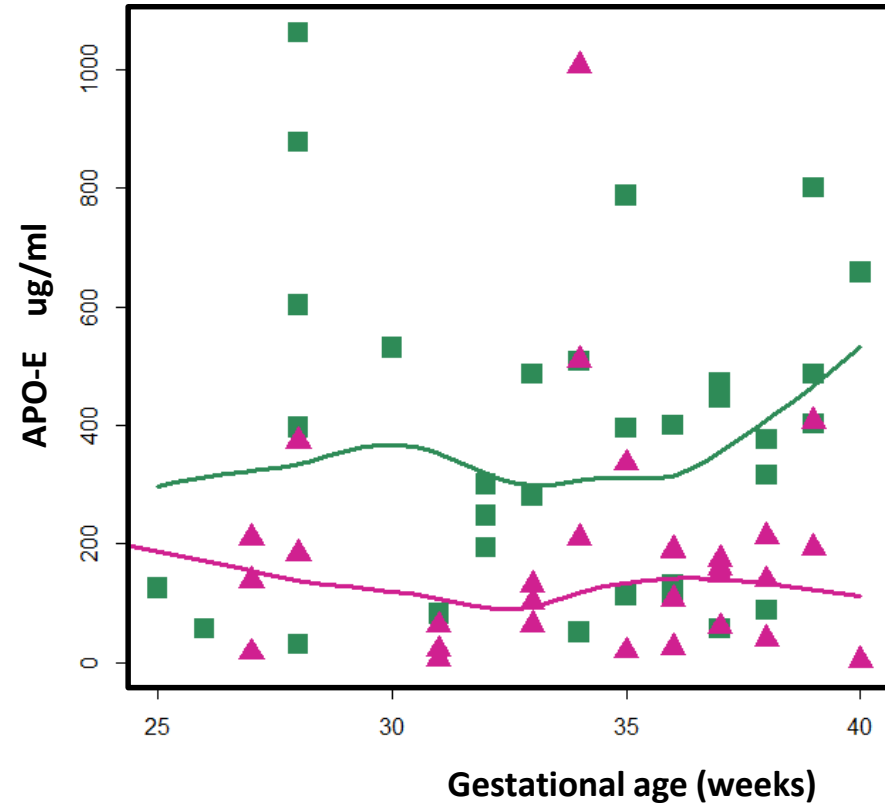

GA 23-34 weeks  
 Normal N=16  
 PE N=15

GA > 34 weeks  
 Normal N=16  
 PE N=17

# APO C-III Validation

$p$  value =  $9.46 \times 10^{-4}$  (all Normal vs PE)

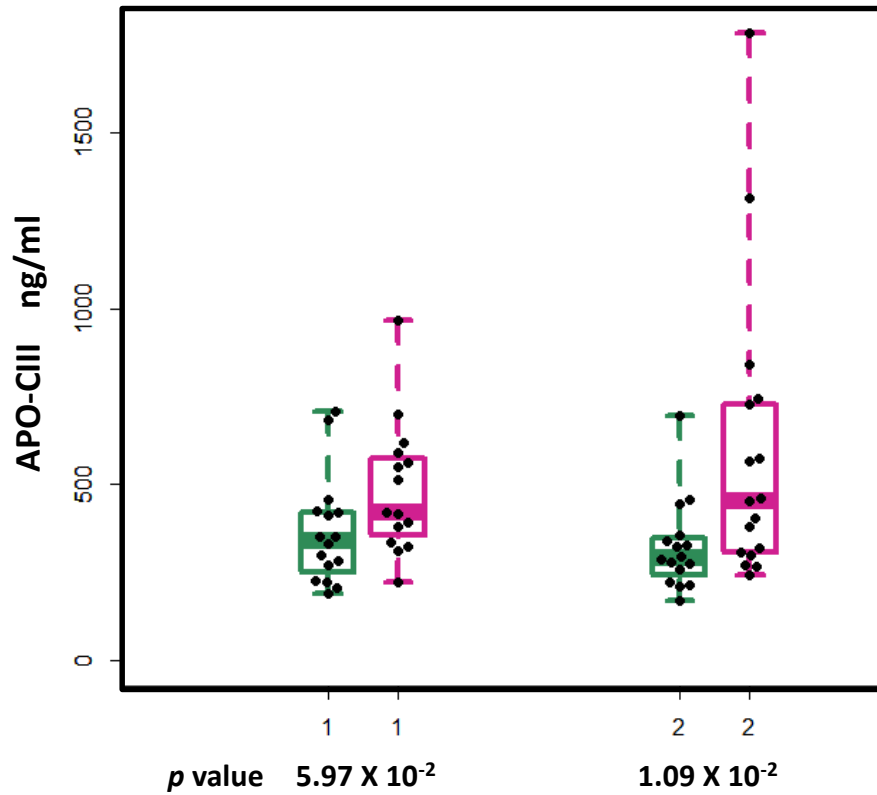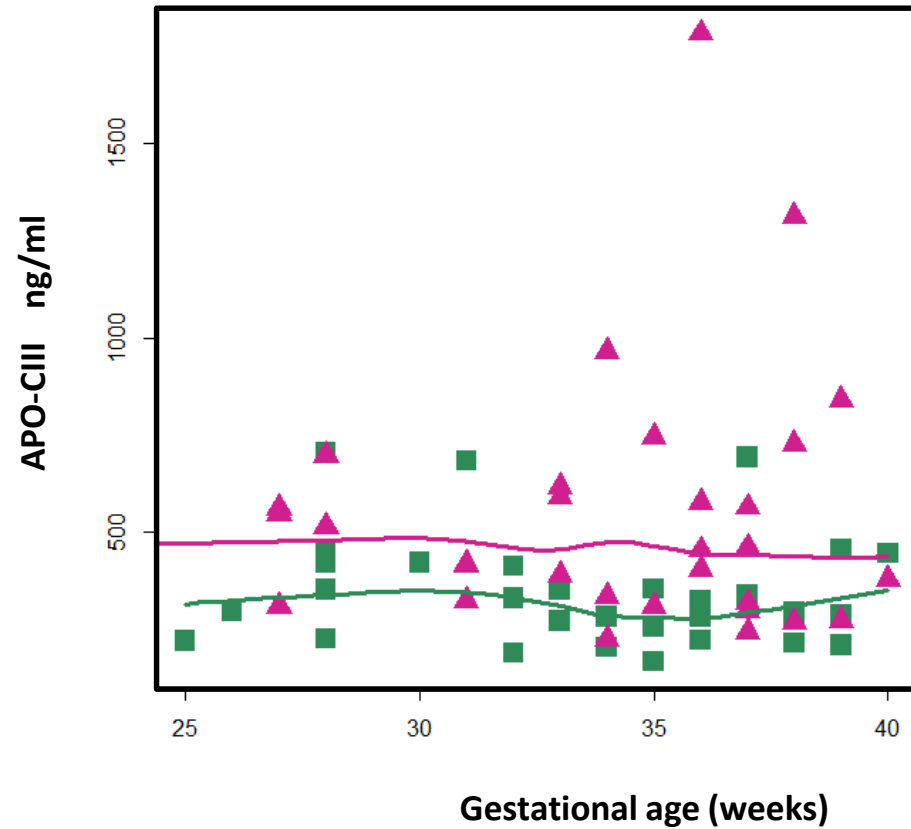

GA 23-34 weeks  
 Normal N=16  
 PE N=15

GA > 34 weeks  
 Normal N=16  
 PE N=17



# APO A-I Validation

$p$  value =  $4.46 \times 10^{-4}$  (all Normal vs PE)

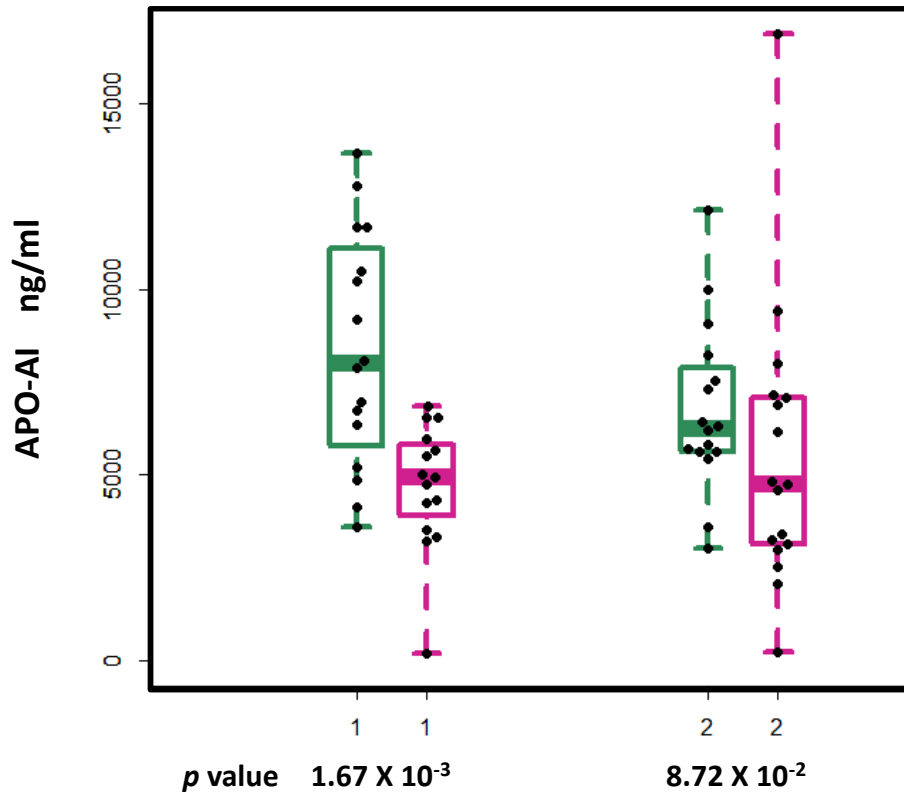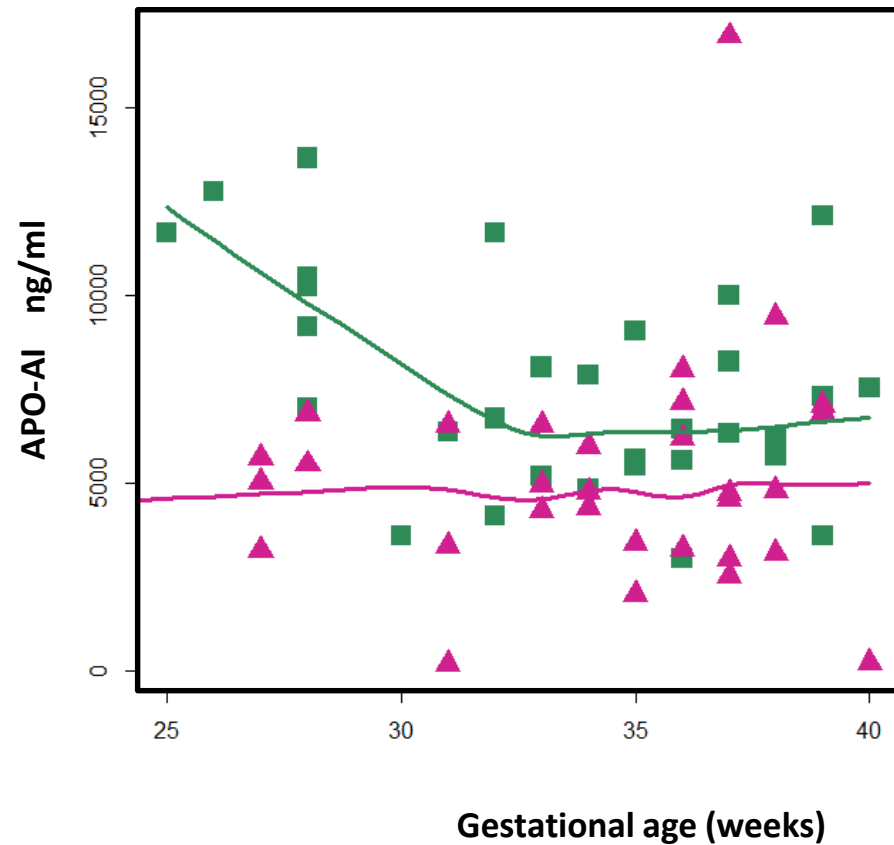

GA 23-34 weeks

Normal

N=16

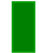

PE

N=15

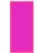

GA > 34 weeks

Normal

N=16

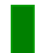

PE

N=17

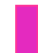

# RBP4 Validation

$p$  value =  $5.32 \times 10^{-3}$  (all Normal vs PE)

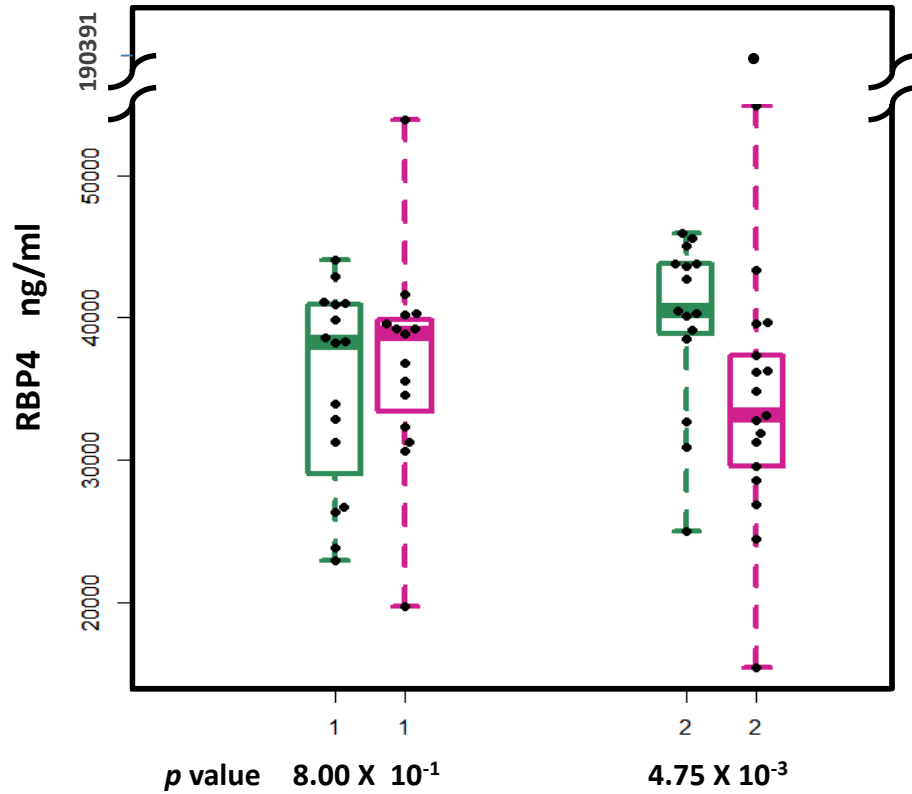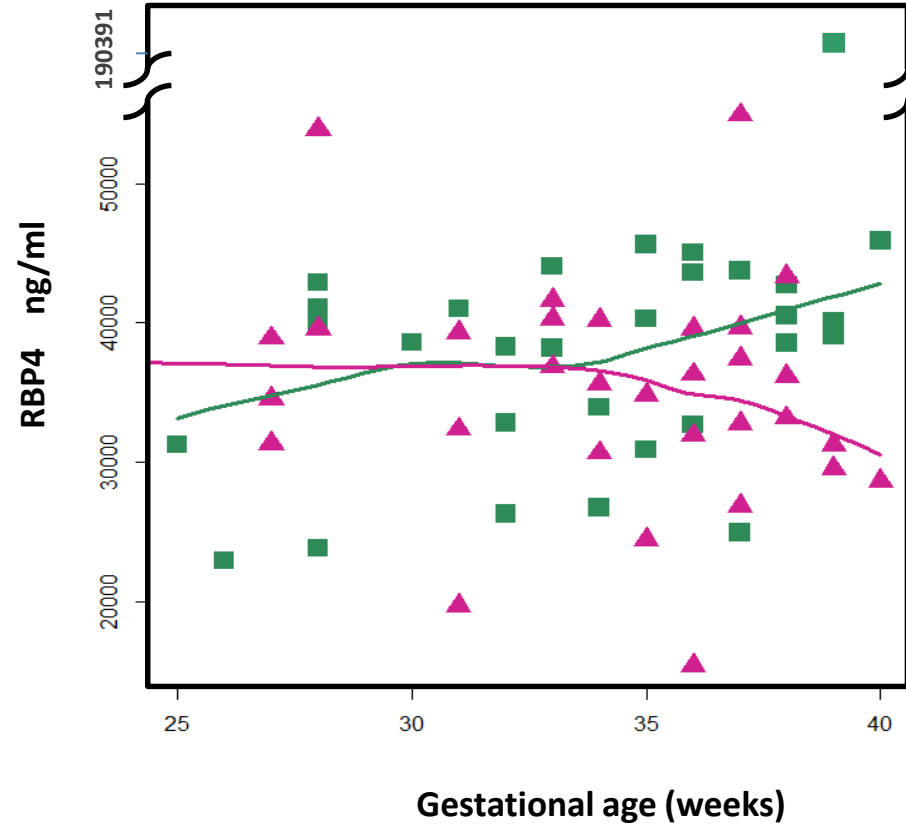

GA 23-34 weeks

Normal

N=16

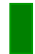

PE

N=15

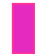

GA > 34 weeks

Normal

N=16

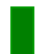

PE

N=17

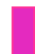

# pikachurin Validation

$p$  value =  $1.92 \times 10^{-8}$  (all Normal vs PE)

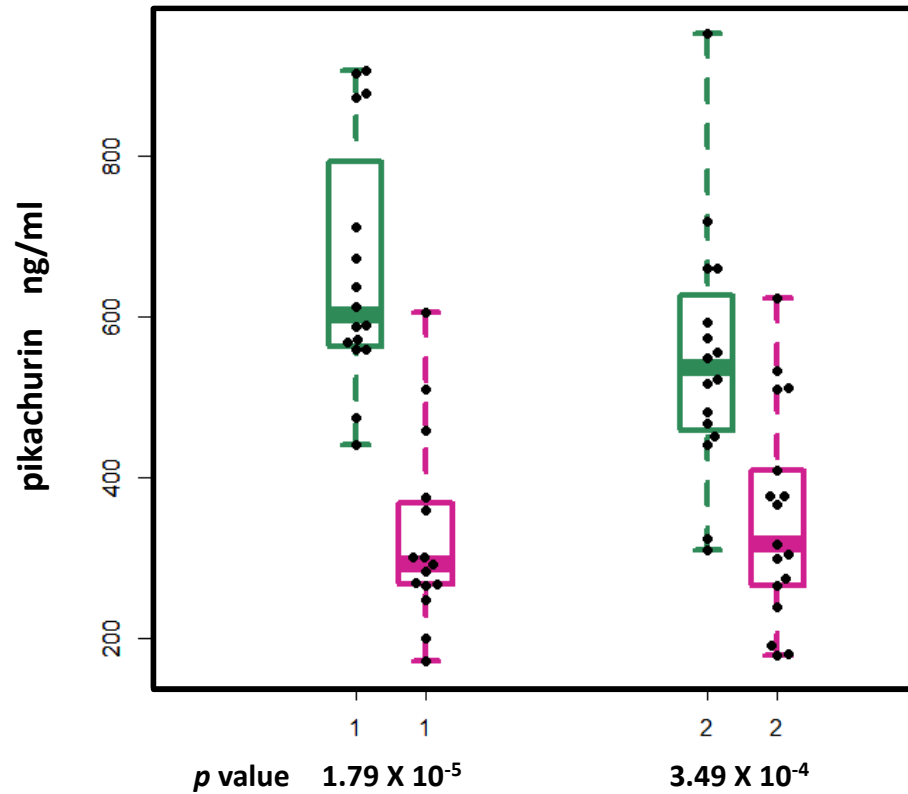

GA 23-34 weeks

Normal

N=16

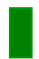

PE

N=15

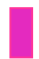

GA > 34 weeks

Normal

N=16

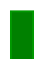

PE

N=17

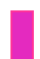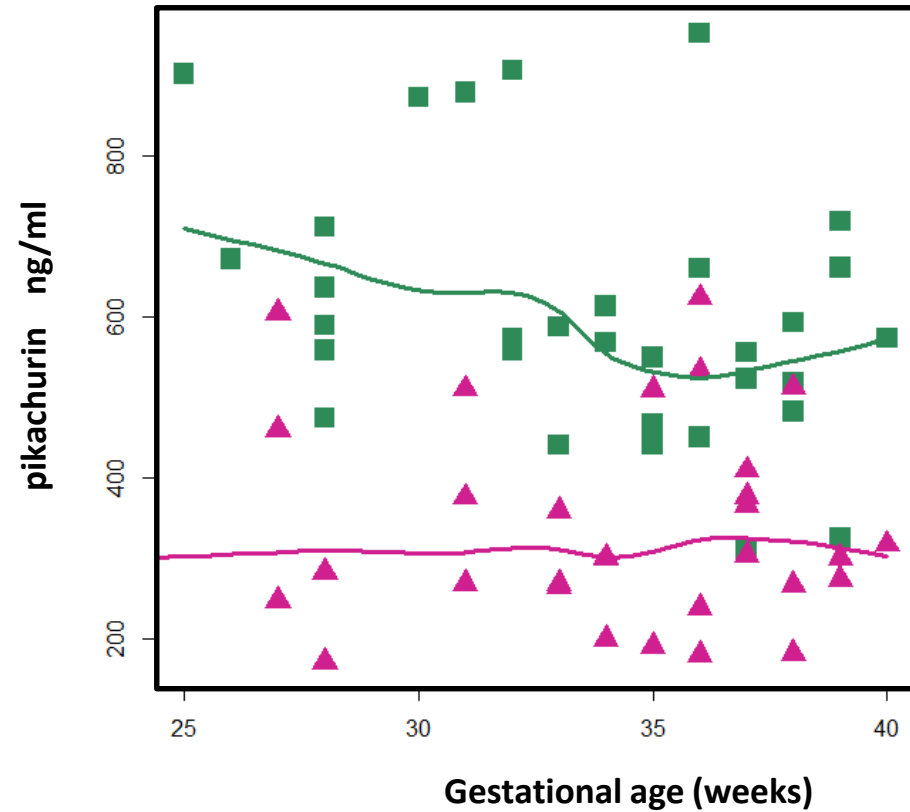

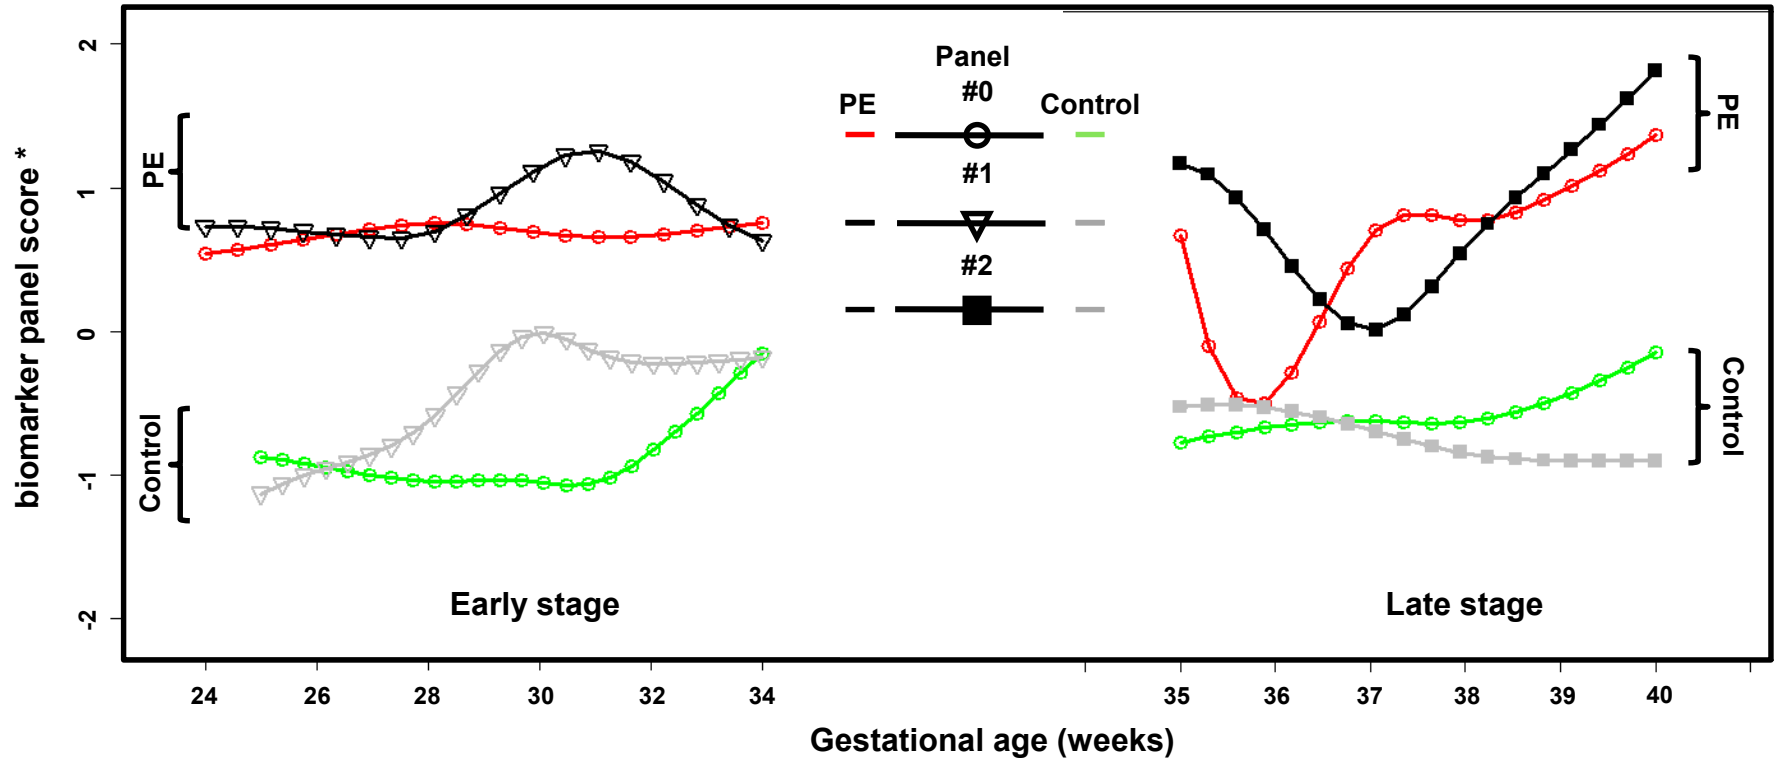

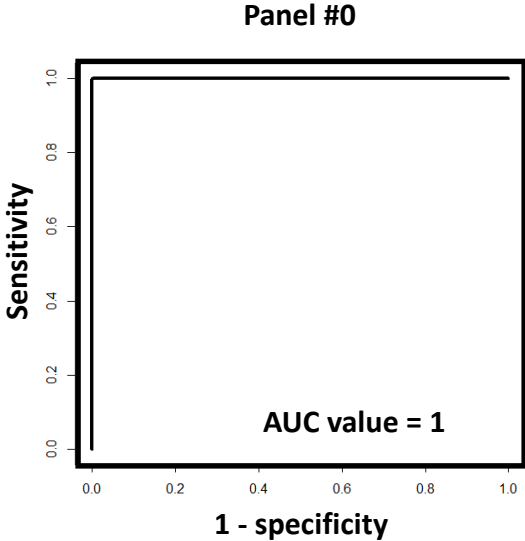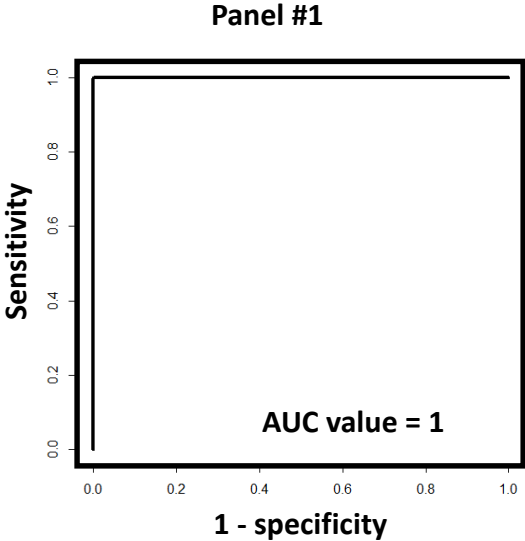

**Early gestational age**

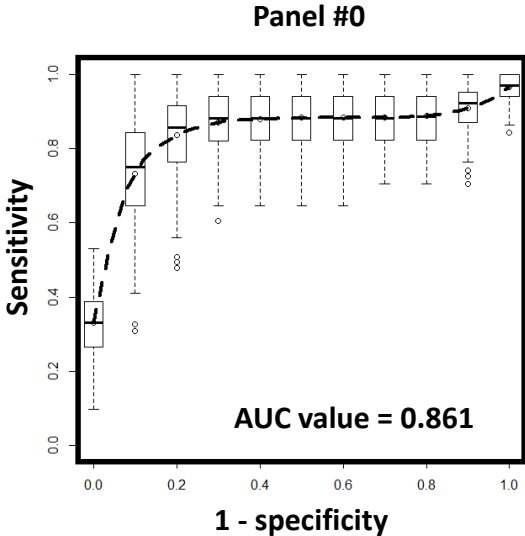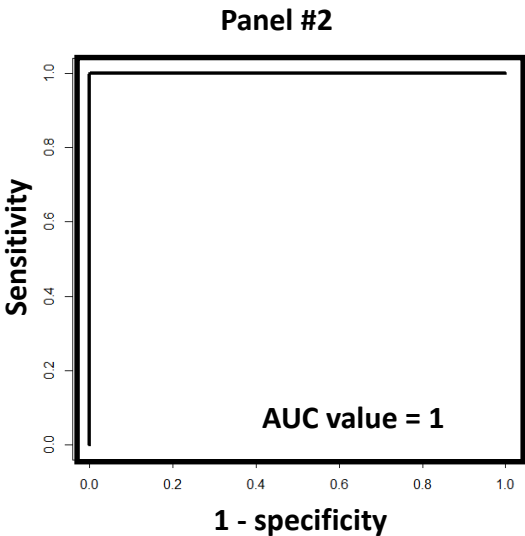

**Late gestational age**
